# Supplementary material for: Using low generation dendrimers as monomers to construct dendronized hyperbranched polymers with high nonlinear optical performance
Source: Royal Society of Chemistry journal article supplement (doi:10.1039/c4tc01396d), 2014-07-25
Supplement: c4tc01396d1.pdf [file c4tc01396d1.pdf]

## Electronic Supplementary Information:

### Using low generation dendrimers as monomers to construct dendronized hyperbranched polymers with high nonlinear optical performance

Wenbo Wu,<sup>a</sup> Zhen Xu,<sup>a</sup> and Zhen Li<sup>\*a</sup>

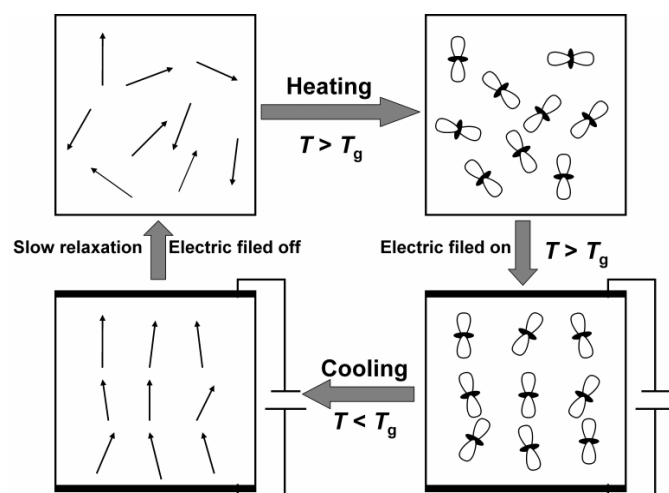

Chart S1. Graphical illustration of poling procedure for NLO polymers.

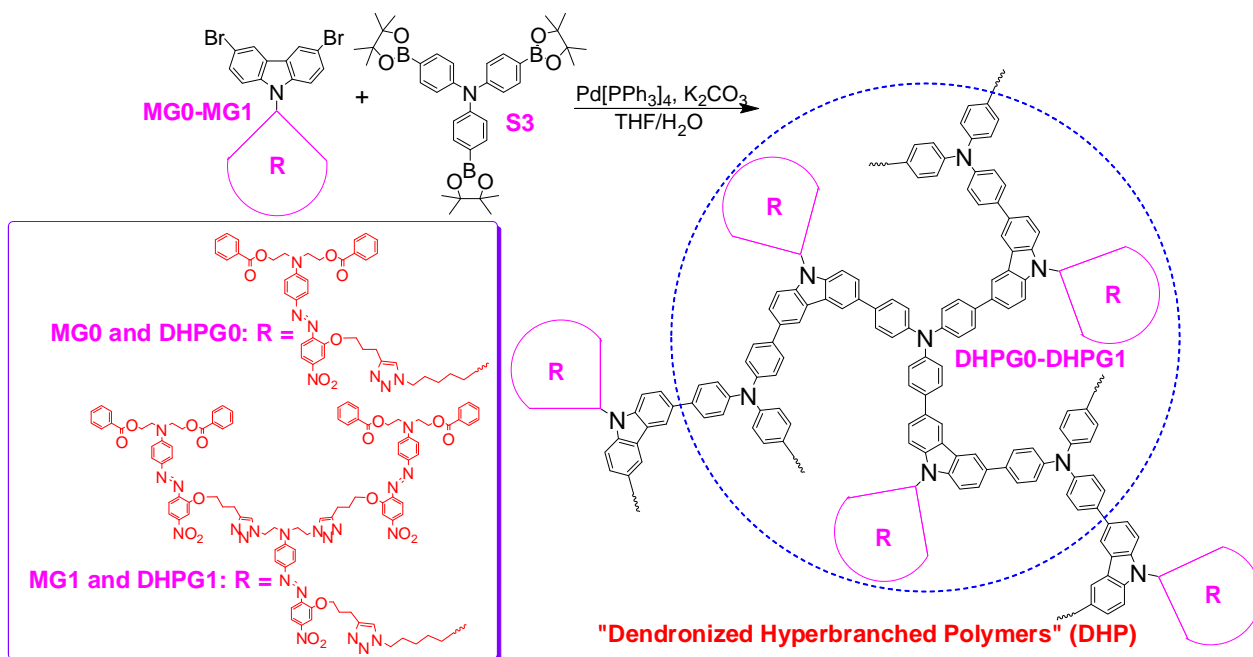

Chart S2. The structure of dendronized hyperbranched polymers DHPG0 and DHPG1.

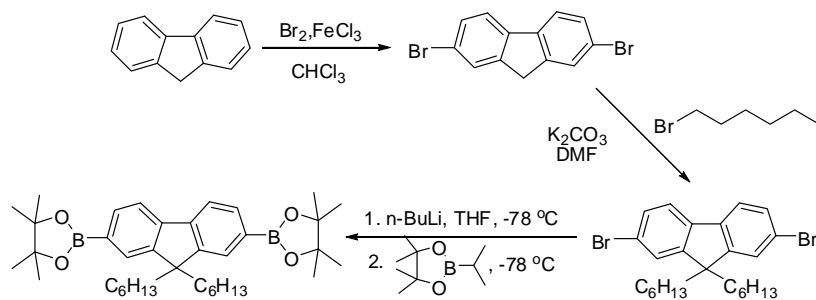

**Scheme S1.** The synthetic route to the 9,9-dihexyl-2,7-bis(4,4,5,5-tetramethyl-1,3,2-dioxaborate).

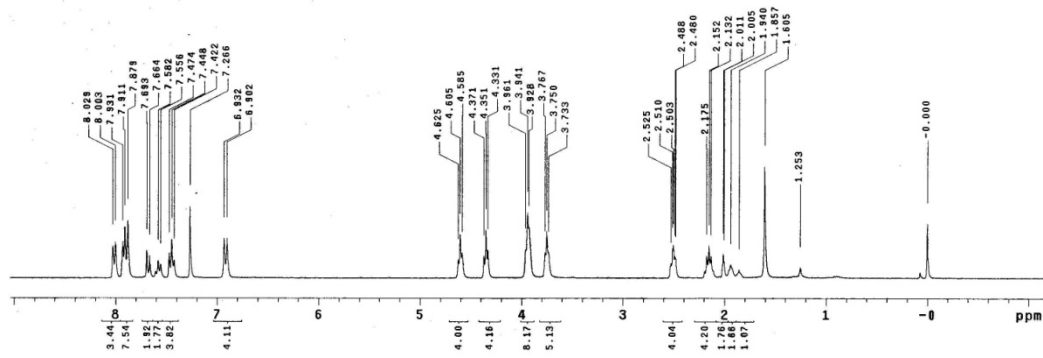

**Fig. S1**  $^1\text{H}$  NMR spectrum of S3 in chloroform-*d*.

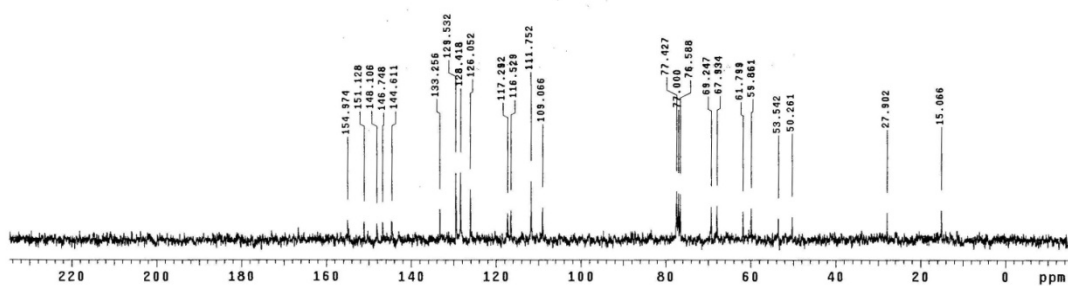

**Fig. S2**  $^{13}\text{C}$  NMR spectrum of S3 in chloroform-*d*.

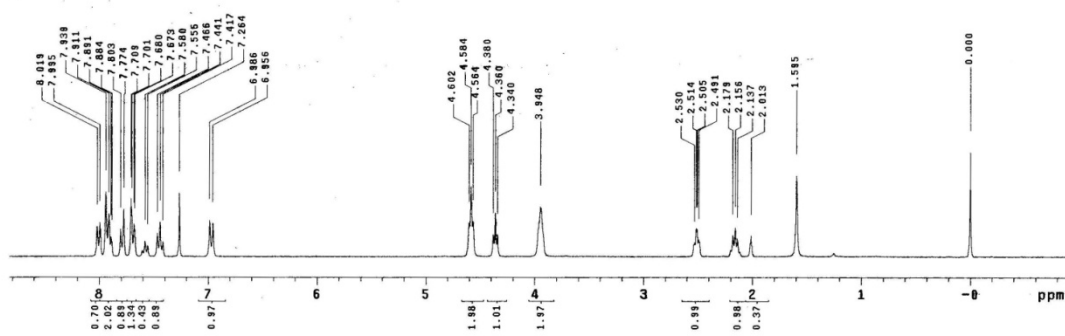

**Fig. S3**  $^1\text{H}$  NMR spectrum of G0≡ in chloroform-*d*.

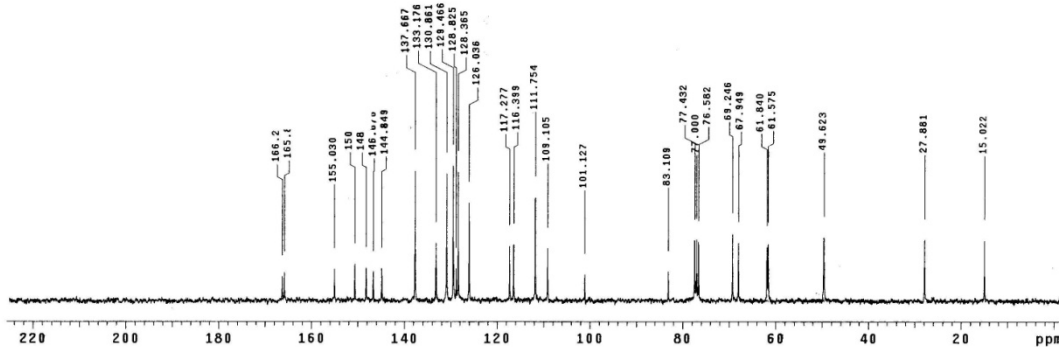

Fig. S4  $^{13}\text{C}$  NMR spectrum of  $\text{G0}\equiv$  in chloroform- $d$ .

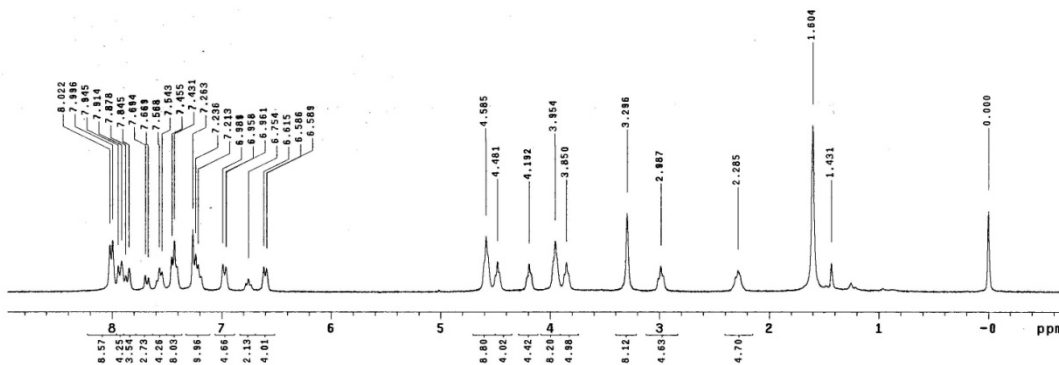

Fig. S5  $^1\text{H}$  NMR spectrum of  $\text{S7}$  in chloroform- $d$ .

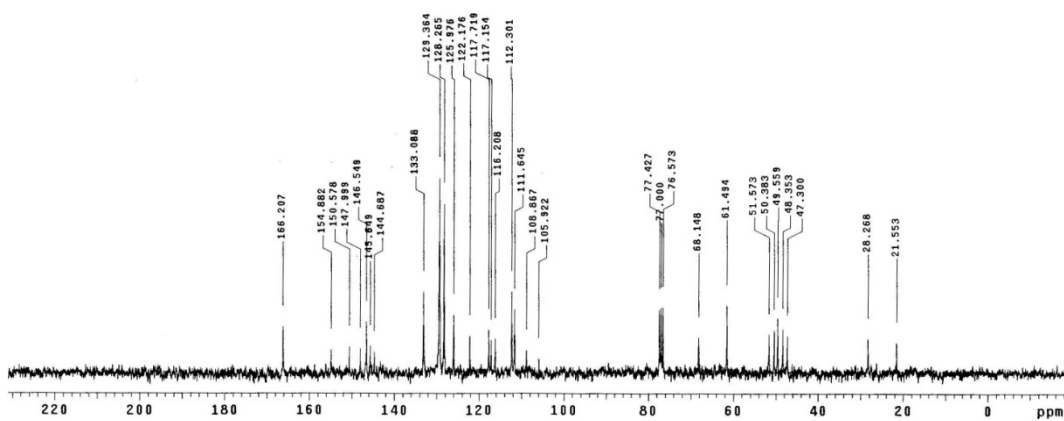

Fig. S6  $^{13}\text{C}$  NMR spectrum of  $\text{S7}$  in chloroform- $d$ .



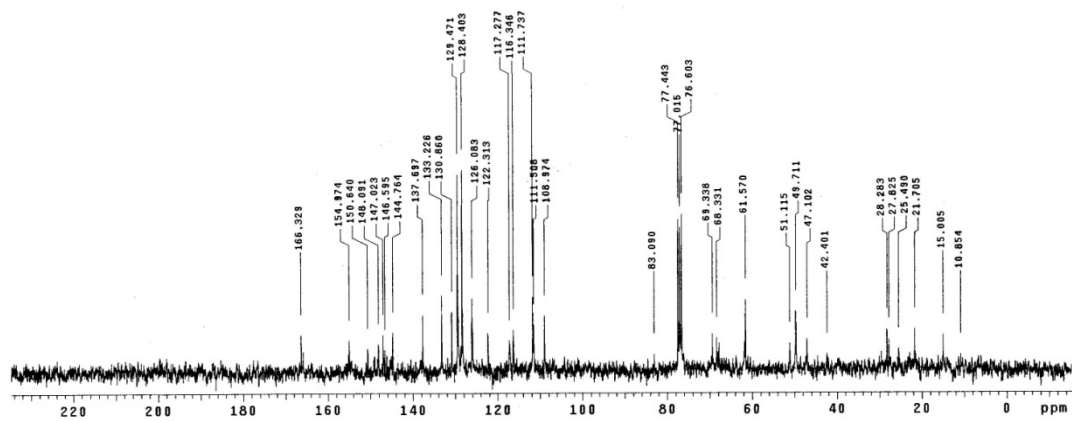

Fig. S10  $^{13}\text{C}$  NMR spectrum of **G1**≡ in chloroform-*d*.

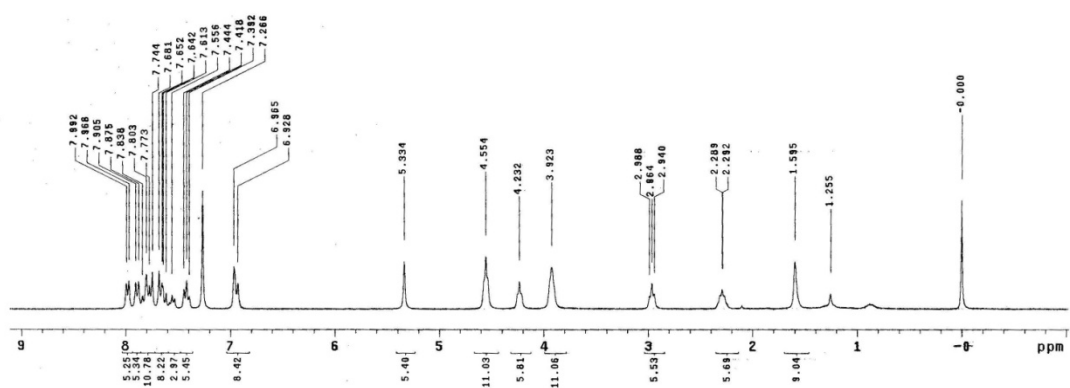

Fig. S11  $^1\text{H}$  NMR spectrum of **MG1** in chloroform-*d*.

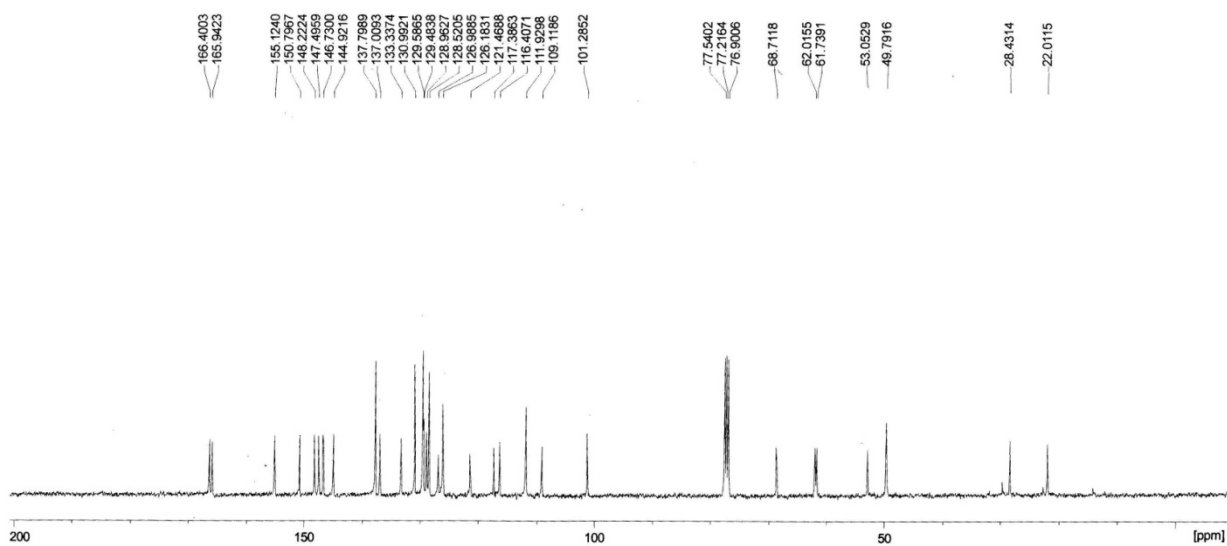

Fig. S12  $^{13}\text{C}$  NMR spectrum of **MG1** in chloroform-*d*.

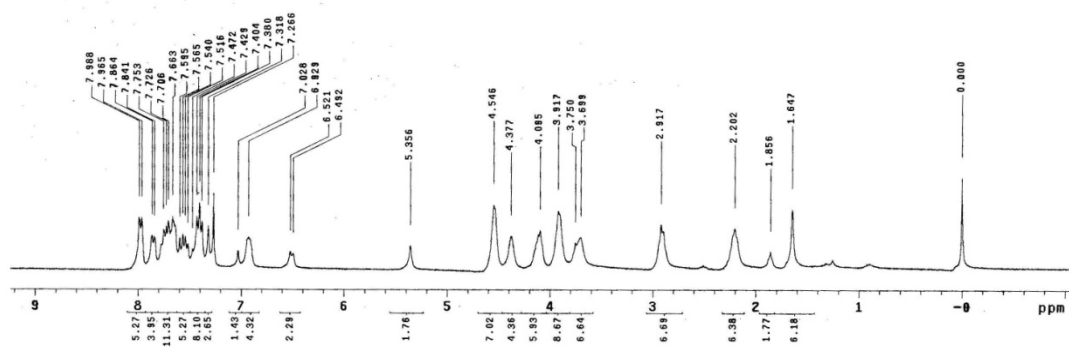

Fig. S13  $^1\text{H}$  NMR spectrum of MG2 in chloroform-*d*.

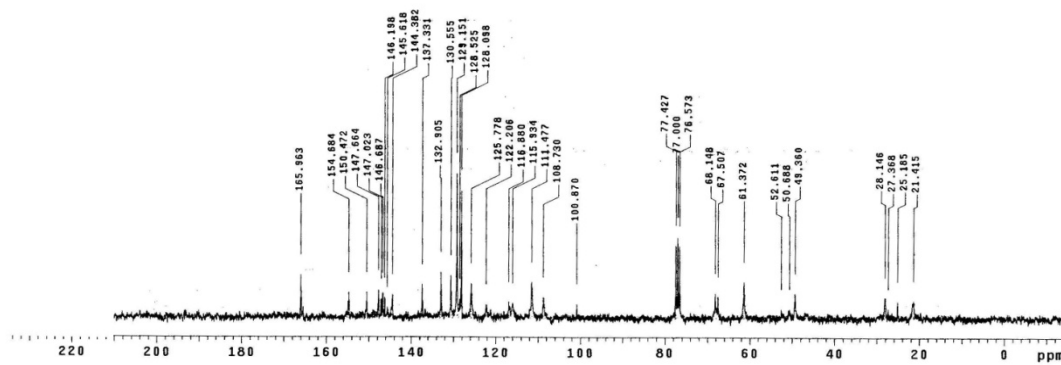

Fig. S14  $^{13}\text{C}$  NMR spectrum of MG2 in chloroform-*d*.

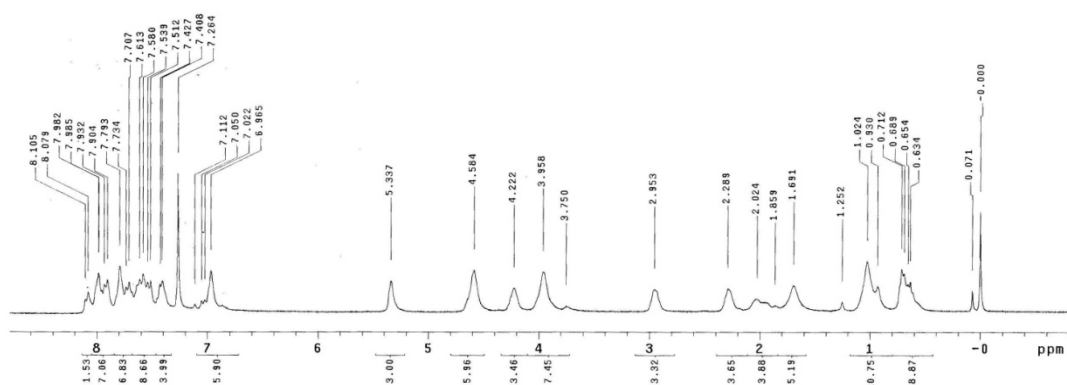

Fig. S15  $^1\text{H}$  NMR spectrum of PG1 in chloroform-*d*.

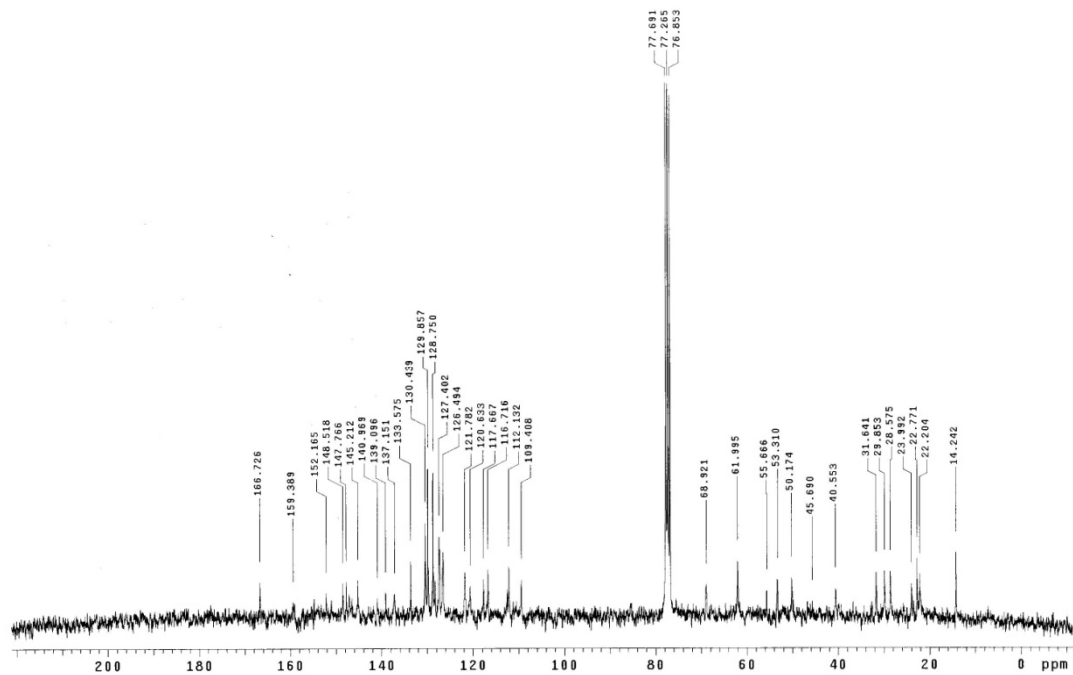

Fig. S16  $^{13}\text{C}$  NMR spectrum of PG1 in chloroform-*d*.

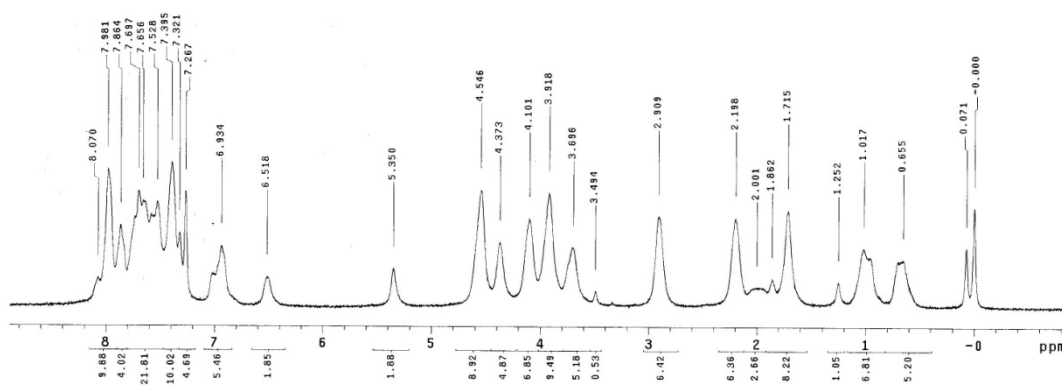

Fig. S17  $^1\text{H}$  NMR spectrum of PG2 in chloroform-*d*.

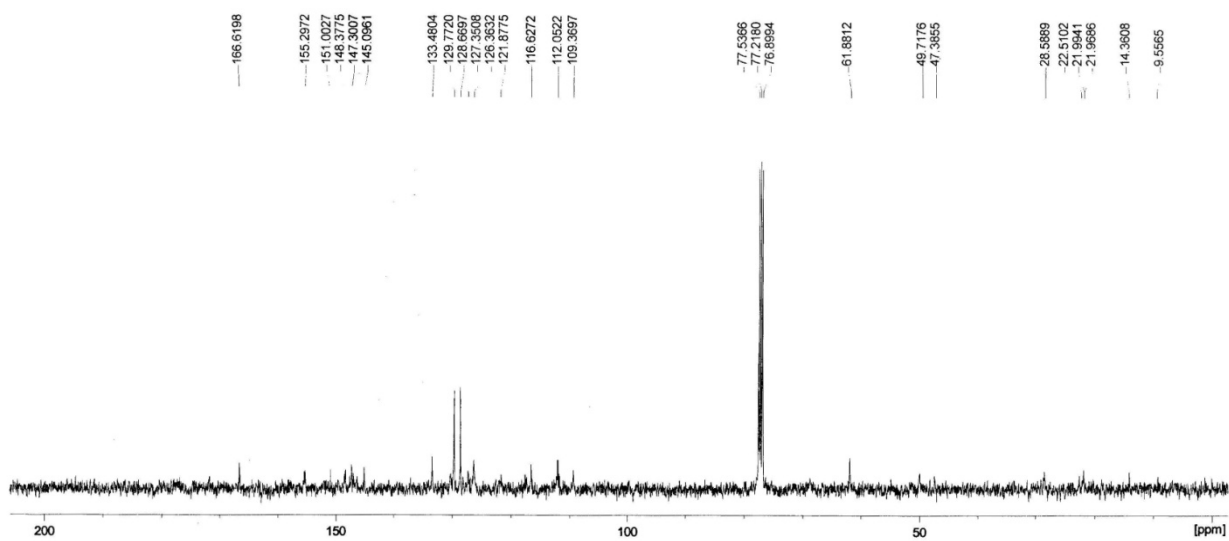

Fig. S18  $^{13}\text{C}$  NMR spectrum of PG2 in chloroform-*d*.

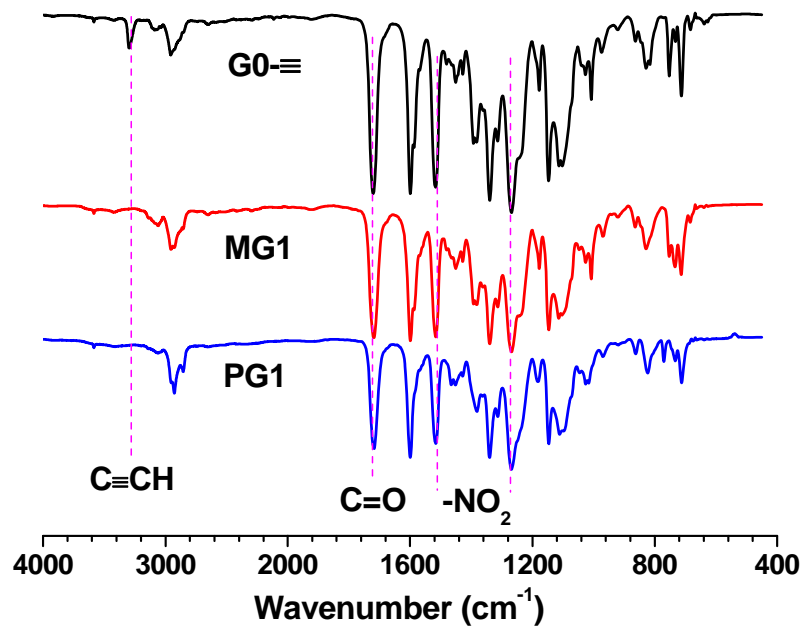

Fig. S19 The FT-IR spectra of PG1 and its corresponding monomer.

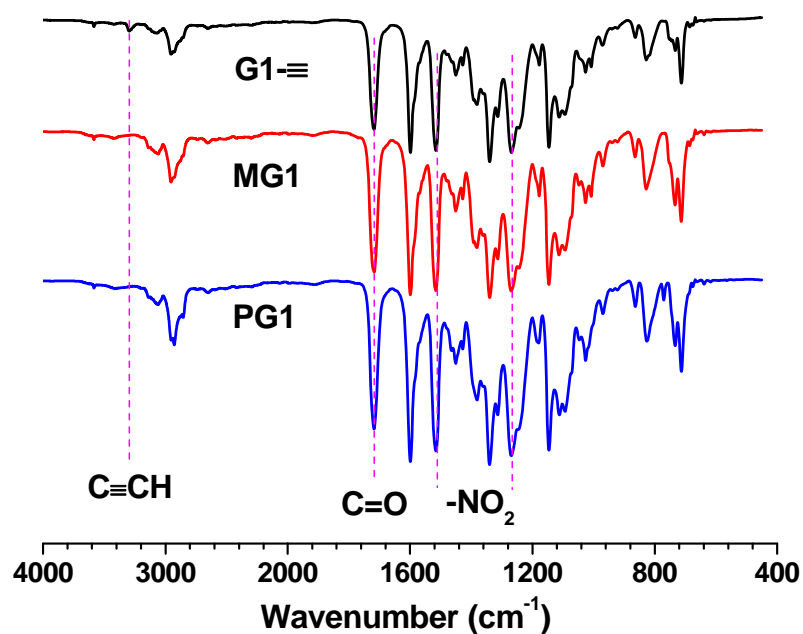

Fig. S20 The FT-IR spectra of PG2 and its corresponding monomer.



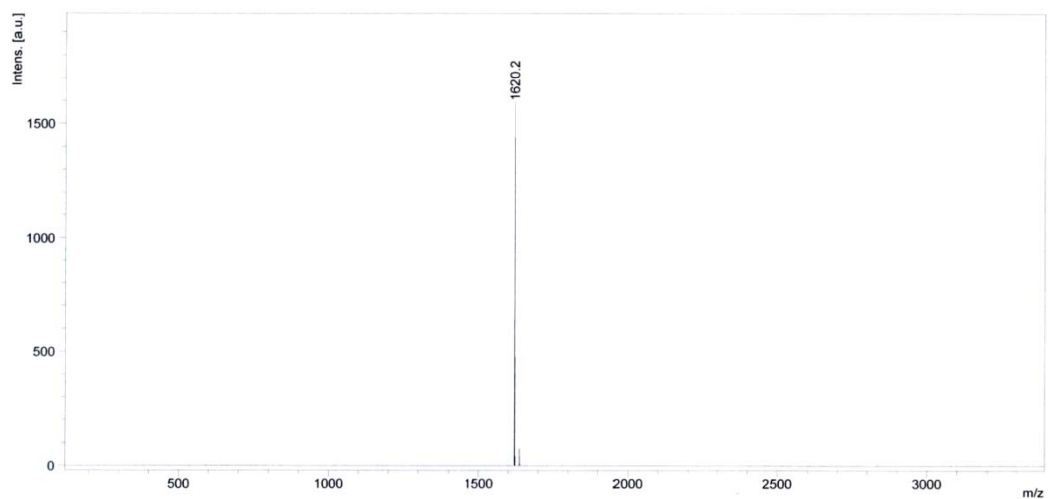

**Fig. S21** The MALDI-TOF mass spectrum of **S8**.

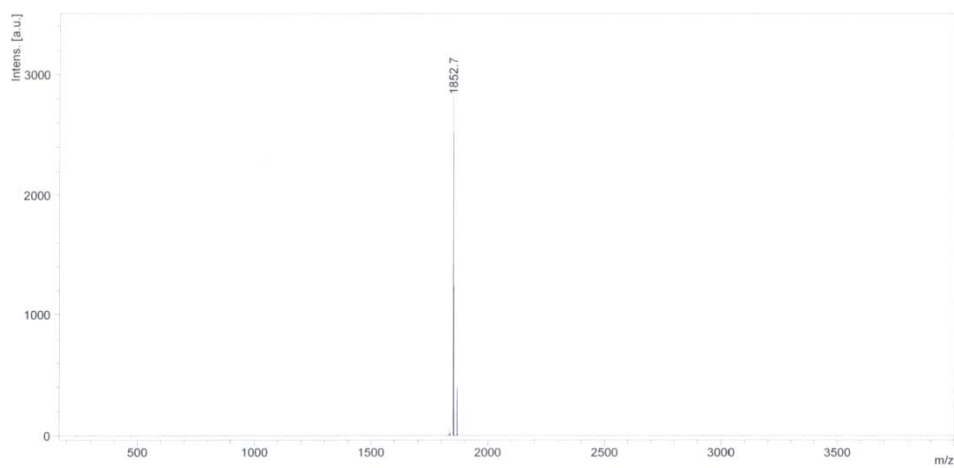

**Fig. S22** The MALDI-TOF mass spectrum of **G1-≡**.

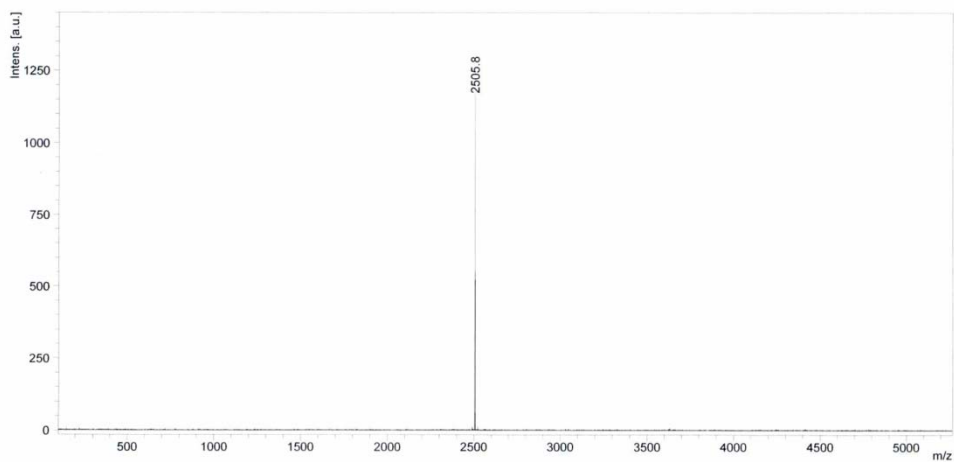

**Fig. S23** The MALDI-TOF mass spectrum of **MG1**.

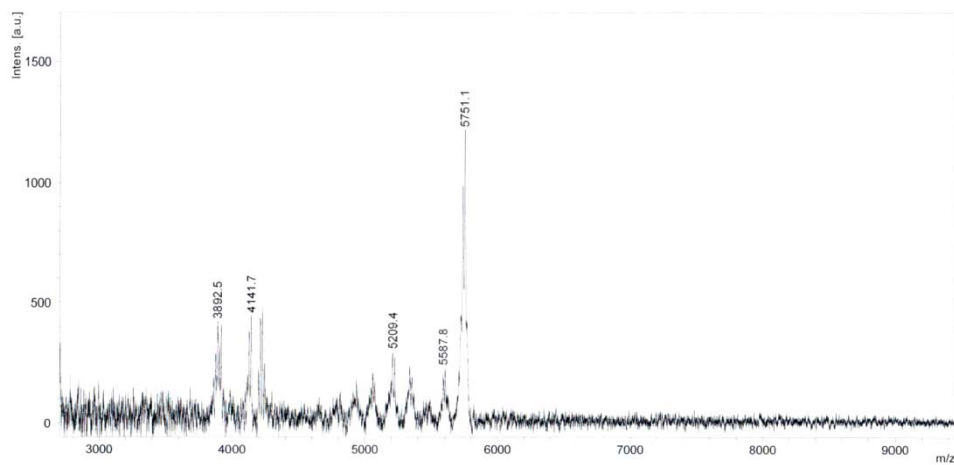

**Fig. S24** The MALDI-TOF mass spectrum of **MG2**.

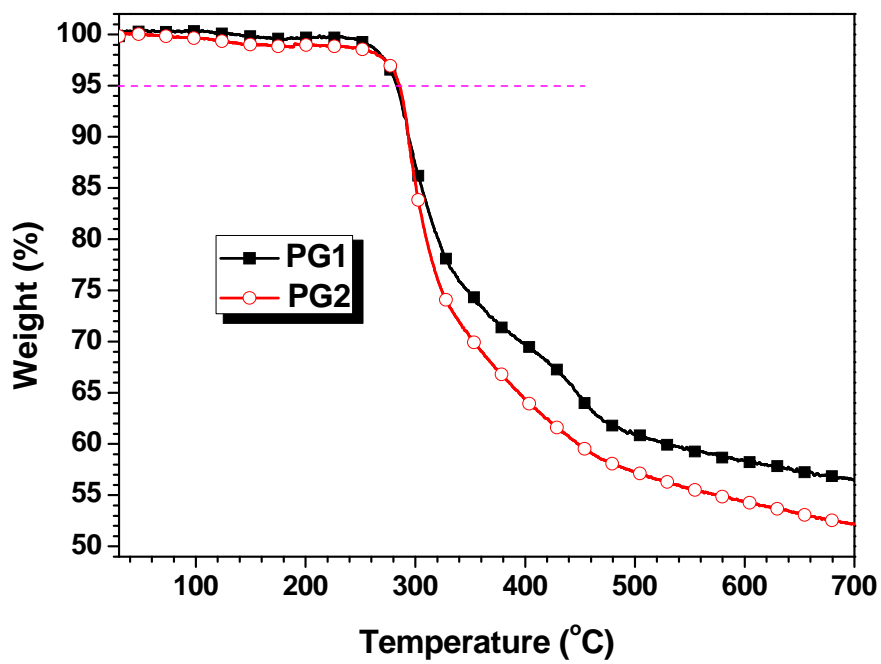

**Fig. S25** TGA thermograms of hyperbranched polymers, measured in nitrogen at a heating rate of 10 °C/min.

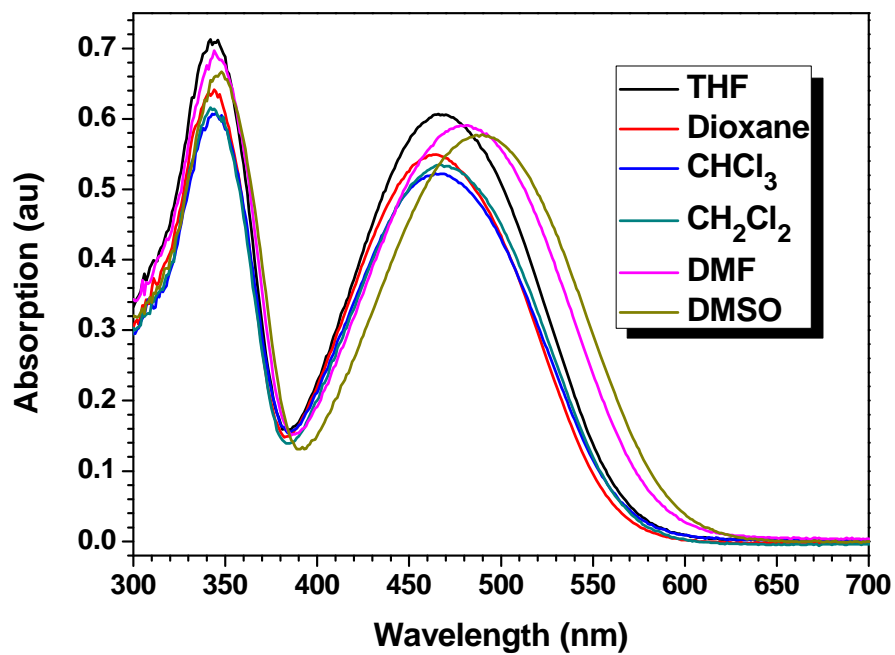

Fig. S26 UV-Vis spectra of **PG1** in different solutions. (0.02 mg/mL).

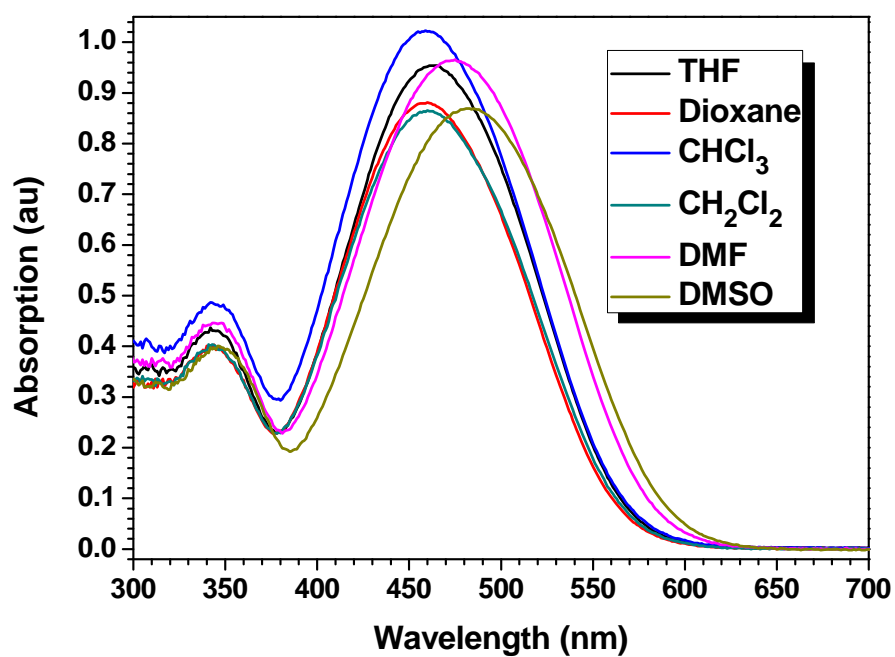

Fig. S27 UV-Vis spectra of **PG2** in different solutions. (0.02 mg/mL).

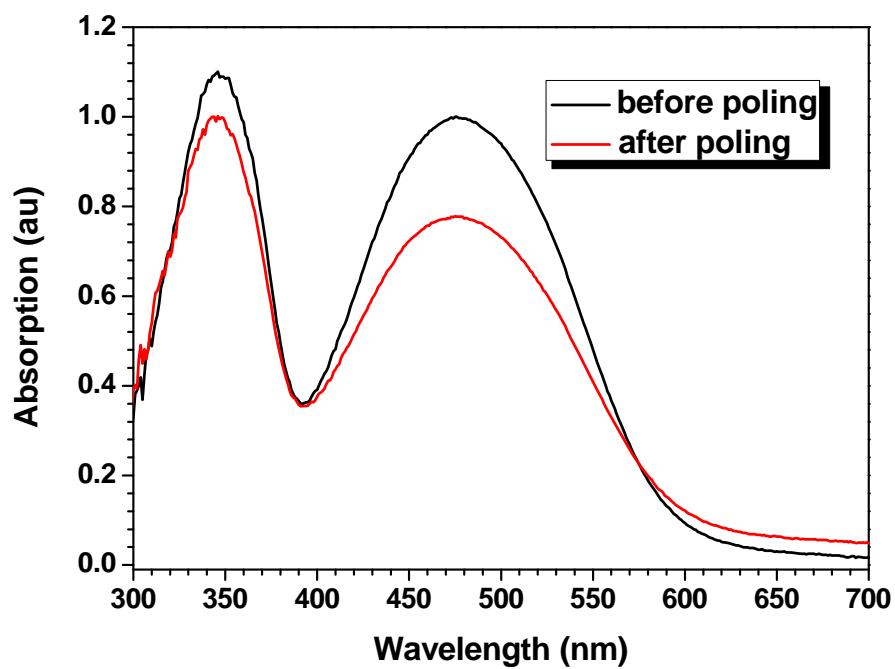

Fig. S28 Absorption spectra of the film of PG1 before and after poling.

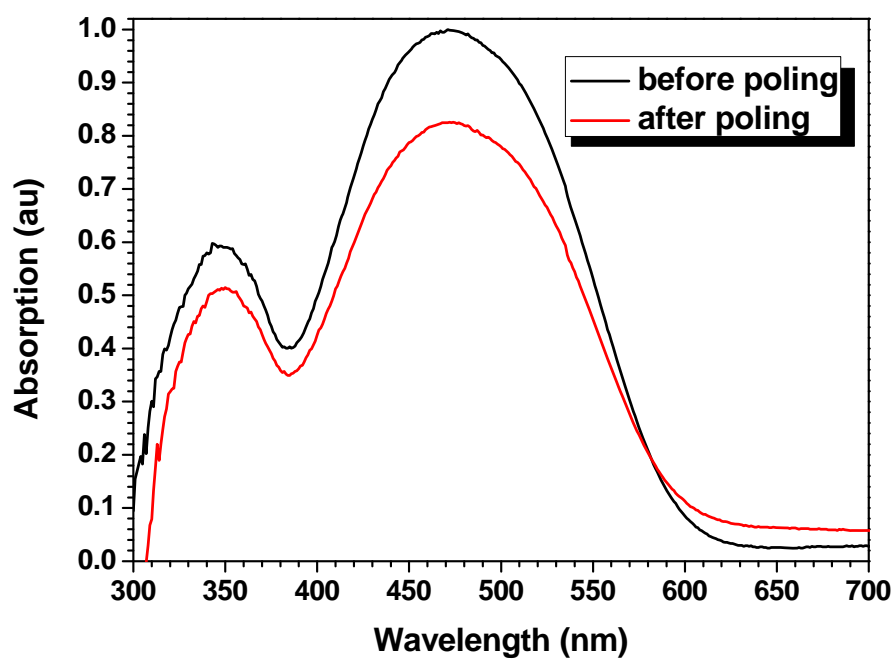

Fig. S29 Absorption spectra of the film of PG2 before and after poling.
